# Supplementary material for: Web-Based Self-Reported Height, Weight, and Body Mass Index Among Swedish Adolescents: A Validation Study
Source: PubMed Central journal article supplement (PMC4382564; doi:10.2196/jmir.3947), 2015-03-18
Supplement: jmir_v17i3e73_app1.pdf [file jmir_v17i3e73_app1.pdf]

## Validation of web-based self-reported height, weight and BMI among Swedish adolescents

Sandra Ekström, MSc<sup>1</sup>; Inger Kull, PhD<sup>1,2,3</sup>; Sara Nilsson, MSc<sup>4</sup>; and Anna Bergström, PhD<sup>1</sup>

Comparison of lifestyle and demographic characteristics among adolescents included in the study population and total number of adolescents answering the 16 year questionnaire.

|                                                         | Included in analyses<br>(n= 1,698) <sup>a</sup> | Not fulfilling the inclusion criteria<br>(n= 1,417) <sup>a</sup> | P-value |
|---------------------------------------------------------|-------------------------------------------------|------------------------------------------------------------------|---------|
| Age (years) <sup>b</sup> , mean (sd)                    | 16.5 (0.3)                                      | 16.6 (0.4)                                                       | <.001   |
| <b>Parental socioeconomic status at 8 years, n (%)</b>  |                                                 |                                                                  |         |
| - Professional worker                                   | 1,458 (90.06)                                   | 1,174 (89.82)                                                    | .84     |
| <b>Any parent born outside of Scandinavia, n (%)</b>    | 267 (16.46)                                     | 186 (14.04)                                                      | .07     |
| <b>BMI status<sup>c</sup>, n (%)</b>                    |                                                 |                                                                  |         |
| - underweight                                           | 114 (6.71)                                      | 48 (5.40)                                                        |         |
| - normal weight                                         | 1,309 (77.09)                                   | 683 (76.83)                                                      |         |
| - overweight                                            | 231 (13.60)                                     | 135 (15.19)                                                      |         |
| - obese                                                 | 44 (2.59)                                       | 23 (2.59)                                                        | .45     |
| <b>Pubertal status, n (%)</b>                           |                                                 |                                                                  |         |
| - pre/early                                             | 26 (1.72)                                       | 10 (0.80)                                                        |         |
| - mid                                                   | 303 (20.07)                                     | 258 (20.76)                                                      |         |
| - late/post                                             | 1,181 (78.21)                                   | 975 (78.44)                                                      | .10     |
| <b>Vigorous physical</b> (h/week), mean (sd)            | 4.8 (4.2)                                       | 5.3 (5.0)                                                        | 0.01    |
| <b>Sedentary time</b> (h/day), mean (sd)                | 4.0 (2.2)                                       | 4.0 (2.2)                                                        | 0.81    |
| <b>Sleep 8 h/day, n (%)</b>                             | 948 (56.03)                                     | 825 (58.51)                                                      | .16     |
| <b>Fruit and vegetable consumption every day, n (%)</b> | 960 (56.91)                                     | 794 (57.16)                                                      | .89     |
| <b>Tobacco use, n (%)</b>                               | 238 (14.03)                                     | 194 (13.77)                                                      | .83     |
| <b>Blood pressure</b> (mmHg), mean (sd)                 |                                                 |                                                                  |         |
| - Systolic                                              | 121.3 (11.9)                                    | 121.5 (11.4)                                                     | 0.79    |
| - Diastolic                                             | 67.2 (7.0)                                      | 67.1 (6.8)                                                       | 0.84    |
| <b>Consider themselves completely healthy, n (%)</b>    | 1,382 (81.63)                                   | 1,107 (78.40)                                                    | .003    |

<sup>a</sup> numbers might not add up to total due to missing

<sup>b</sup> when answering the questionnaire

<sup>c</sup> based on measured weight and height
